# Supplementary material for: Characterization of the β-defensin genes in giant panda
Source: PubMed Central journal article supplement (PMC6098084; doi:10.1038/s41598-018-29898-2), 2018-08-17
Supplement: 41598_2018_29898_MOESM1_ESM.pdf [file 41598_2018_29898_MOESM1_ESM.pdf]

1 **Characterization of the  $\beta$ -defensin genes in giant panda**

2

3 **Zhi-Yi Zhang<sup>1</sup>, He-Min Zhang<sup>2</sup>, De-Sheng Li<sup>2</sup>, Tie-Yi Xiong<sup>3</sup> and Sheng-Guo Fang<sup>1\*</sup>**

4 <sup>1</sup>The Key Laboratory of Conservation Biology for Endangered Wildlife of the Ministry of Education, and State  
5 Conservation Centre for Gene Resources of Endangered Wildlife, College of Life Sciences, Zhejiang University,  
6 Hangzhou 310058, P. R. China.

7 <sup>2</sup>China Research and Conservation Center for the Giant Panda, Wolong 623000, P. R. China.

8 <sup>3</sup>Emeishan Biological Resources Research Station, Sichuan Provincial Academy of Natural Resources Sciences,  
9 Chengdu 610015, P. R. China.

10 \*Correspondence and requests for materials should be addressed to S.G.F. (sgfanglab@zju.edu.cn)

11

12

13

14

15

16

17

18

19

20

21

22

23

24

25

26

27

28

29

30

31

32 **Supplementary Table S1** Gene structure of  $\beta$ -defensins in the giant panda.

| Gene              | Orientation | Location     | Exon1            | Exon2            | Exon3       |
|-------------------|-------------|--------------|------------------|------------------|-------------|
| Aime-DEFB132      | -           | scaffold3432 | 10488-10539      | 9000- 9274       |             |
| Aime-DEFB129      | -           | scaffold3432 | 34574-34631      | 32410-32867      |             |
| Aime-DEFB128      | +           | scaffold3432 | 78278-78326      | 79875-80107      |             |
| Aime-DEFB127      | -           | scaffold3432 | 98293-98543      | 96452-96500      |             |
| Aime-DEFB126      | -           | scaffold3432 | 109555-109612    | 105562-105770    |             |
| Aime-DEFB126-like | -           | scaffold3432 | 148464-148521    | 144226-144476    |             |
| Aime-DEFB125      | +           | scaffold3401 | 25963-26020      | 41490-41778      |             |
| Aime-DEFB124      | +           | scaffold1318 | 1726347-1726404  | 1729389-1729539  |             |
| Aime-DEFB123      | -           | scaffold1318 | 1745657-1745714  | 1739422-1739564  |             |
| Aime-DEFB121      | +           | scaffold1318 | 1768590-1768647  | 1769840-1769964  |             |
| Aime-DEFB119      | +           | scaffold1318 | 1779016-1779073  | 1780211-1780404  |             |
| Aime-DEFB117      | -           | scaffold1318 | 1813764-1813821  | 1808856-1809106  |             |
| Aime-DEFB116      | +           | scaffold1318 | 1850979-1851045  | 1856001-1856236  |             |
| Aime-DEFB116-like | +           | scaffold1318 | 1870242-1870299  | 1880415-1880638  |             |
| Aime-DEFB136      | -           | scaffold335  | 604982- 605036   | 604360- 604529   |             |
| Aime-DEFB135      | +           | scaffold335  | 652089- 652146   | 653736- 653902   |             |
| Aime-DEFB134      | -           | scaffold335  | 678157- 678214   | 675351- 675490   |             |
| Aime-DEFB131      | -           | scaffold335  | 701224- 701281   | 682822- 682973   |             |
| Aime-DEFB112      | +           | scaffold1375 | 2308954- 2309008 | 2313892-2314049  |             |
| Aime-DEFB110      | +           | scaffold1375 | 2330805- 2330859 | 2335741-2335886  |             |
| Aime-DEFB113      | +           | scaffold1375 | 2366478- 2366535 | 2367249- 2367436 |             |
| Aime-DEFB114      | +           | scaffold1375 | 2374440- 2374497 | 2391545- 2391687 |             |
| Aime-DEFB108      | +           | scaffold2713 | 13062-13149      | 17887-18044      |             |
| Aime-DEFB109      | +           | scaffold2713 | 25139-25193      | 38856-39058      |             |
| Aime-DEFB130      | +           | scaffold2713 | 50401-50458      | 56470-56648      |             |
| Aime-DEFB107      | -           | scaffold2426 | 27514-27571      | 26633-26772      |             |
| Aime-DEFB105      | -           | scaffold2426 | 39499-39585      | 36031-36155      |             |
| Aime-DEFB106      | +           | scaffold2426 | 43832-43880      | 46476-46624      |             |
| Aime-DEFB_SPAG11B | +           | scaffold2426 | 54226-54283      | 55218-55377      | 59539-59669 |
| Aime-DEFB_SPAG11  | +           | scaffold2426 | 75632-75686      | 77109-77290      |             |
| Aime-DEFB103      | +           | scaffold2426 | 96479-96536      | 97504-97646      |             |
| Aime-DEFB4        | +           | scaffold2426 | 106509-106566    | 108386-108465    |             |
| Aime-DEFB138      | +           | scaffold2426 | 118993-119050    | 122020-122147    |             |
| Aime-DEFB139      | -           | scaffold2426 | 129367-129424    | 127106-127236    |             |
| Aime-DEFB140      | -           | scaffold2426 | 134785-134842    | 133973-134109    |             |
| Aime-DEFB1        | +           | scaffold2426 | 185019 185178    | 194476 194621    |             |

33  
34  
35  
36  
37  
38

39 **Supplementary Table S2** Evolutionary distance between the signal peptide region of each  
40 carnivore *DEFB139* and that of non-carnivore *DEFB139* genes.

| Gene                       | dN   | dS   | dN/dS |
|----------------------------|------|------|-------|
| Giant panda <i>DEFB139</i> | 0.35 | 0.44 | 0.79  |
| Seal <i>DEFB139</i>        | 0.21 | 0.50 | 0.43  |
| Walrus <i>DEFB139</i>      | 0.26 | 0.46 | 0.57  |
| Cheetah <i>DEFB139</i>     | 0.29 | 0.68 | 0.42  |
| Cat <i>DEFB139</i>         | 0.28 | 0.69 | 0.40  |
| Dog <i>DEFB139</i>         | 0.18 | 0.59 | 0.31  |
| Polar bear <i>DEFB139</i>  | 0.31 | 0.44 | 0.71  |
| Ferret <i>DEFB139</i>      | 0.25 | 0.41 | 0.61  |
| Tiger <i>DEFB139</i>       | 0.28 | 0.72 | 0.38  |

41

42

43

44

45

46

47

48

49

50

51

52

53

54

55

56 **Supplementary Table S3** Changes in the selective pressure on different carnivore *DEFB139*  
 57 genes relative to the pressure on non-carnivore genes.  
 58 K is the selection intensity parameter,  $K > 1$  indicates that the negative and/or positive selection  
 59 has intensified, whereas  $K < 1$  indicates a relaxed selective pressure. The intensification or  
 60 relaxation of selection is statistically significant at  $p < 0.05$ .

| Lineage tested | K    | LR   | P    |
|----------------|------|------|------|
| Giant panda    | 7.53 | 3.21 | 0.07 |
| Polar bear     | 0.13 | 0.07 | 0.79 |
| Cheetah        | 6.89 | 0.95 | 0.33 |
| Dog            | 0    | 2.22 | 0.14 |
| Cat            | 0    | 0.53 | 0.47 |
| Tiger          | 0    | 0.53 | 0.47 |
| Ferret         | 1.24 | 0.02 | 0.90 |
| Walrus         | 0    | 0.75 | 0.39 |
| Seal           | 0    | 0.52 | 0.47 |

61  
 62  
 63  
 64  
 65  
 66  
 67  
 68  
 69  
 70  
 71  
 72  
 73  
 74  
 75  
 76  
 77  
 78  
 79  
 80

81 **Supplementary Table S4** Physiochemical parameters and Mahalanobis distances of different  
 82 DEFB139 mature peptides expressed in carnivores.  
 83 The isoelectric point and molecular weight were calculated using the Isoelectric Point  
 84 Calculator, and the instability index was measured with ProtParam. All Cys residues were in a  
 85 reduced state when values were calculated. A peptide with an instability index below 40 was  
 86 regarded as stable and with a significantly longer half-life *in vivo*.  $D_2^2$  and  $D_1^2$  represent the  
 87 Mahalanobis distances calculated with and without the Arg-to-Pro-substituted Aime-DEFB139  
 88 mature peptide, respectively. According to the Mahalanobis distances, only Aime-DEFB139  
 89 peptide was an outlier and thus indicated in bold.

| Peptide                                | Isoelectric point (pH unit) | Instability index | Molecular weight (KDa) | $D_1^2/D_2^2$    |
|----------------------------------------|-----------------------------|-------------------|------------------------|------------------|
| Aime-DEFB139                           | 9.97                        | 65.80             | 5.181                  | <b>7.53/7.89</b> |
| Arg-to-Pro-substituted<br>Aime-DEFB139 | 9.37                        | 79.75             | 5.122                  | NA/0.53          |
| Lewe-DEFB139                           | 8.91                        | 80.93             | 5.268                  | 3.39/3.83        |
| Odro-DEFB139                           | 8.91                        | 91.57             | 5.268                  | 3.84/4.40        |
| Acju-DEFB139                           | 9.39                        | 93.99             | 5.140                  | 1.38/1.52        |
| Feca-DEFB139                           | 9.39                        | 93.99             | 5.140                  | 1.38/1.52        |
| Calufa-DEFB139                         | 8.76                        | 69.97             | 5.104                  | 4.21/4.32        |
| Urma-DEFB139                           | 9.15                        | 91.09             | 5.058                  | 2.90/2.83        |
| Mupufu-DEFB139                         | 8.91                        | 77.86             | 5.103                  | 2.17/2.37        |
| Pati-DEFB139                           | 9.39                        | 93.99             | 5.140                  | 1.38/1.52        |

90  
 91  
 92  
 93  
 94  
 95  
 96  
 97  
 98  
 99  
 100  
 101  
 102  
 103  
 104  
 105  
 106  
 107  
 108  
 109  
 110  
 111  
 112

113 **Supplementary Table S5** ANOVA analyses of differences in antimicrobial activities between  
 114 the AcM-protected Aime-DEFB139 mature peptide and the Arg-to-Pro-substituted  
 115 Aime-DEFB139.  
 116 P < 0.05 indicates a statistically significant antimicrobial activity.

| Bacteria                 | Defensins                              | Time points | P values     |
|--------------------------|----------------------------------------|-------------|--------------|
| <i>E. coli</i>           | Aime-DEFB139                           | 8 h         | <b>0.000</b> |
|                          |                                        | 18 h        | <b>0.000</b> |
|                          |                                        | 24 h        | <b>0.000</b> |
|                          | Arg-to-Pro-substituted<br>Aime-DEFB139 | 8 h         | <b>0.000</b> |
|                          |                                        | 18 h        | <b>0.000</b> |
|                          |                                        | 24 h        | <b>0.000</b> |
| <i>S. aureus</i>         | Aime-DEFB139                           | 8 h         | <b>0.003</b> |
|                          |                                        | 18 h        | <b>0.000</b> |
|                          |                                        | 24 h        | <b>0.000</b> |
|                          | Arg-to-Pro-substituted<br>Aime-DEFB139 | 8 h         | 0.070        |
|                          |                                        | 18 h        | <b>0.003</b> |
|                          |                                        | 24 h        | <b>0.007</b> |
| <i>K. pneumoniae</i>     | Aime-DEFB139                           | 8 h         | <b>0.000</b> |
|                          |                                        | 18 h        | <b>0.000</b> |
|                          |                                        | 24 h        | <b>0.000</b> |
|                          | Arg-to-Pro-substituted<br>Aime-DEFB139 | 8 h         | <b>0.000</b> |
|                          |                                        | 18 h        | <b>0.000</b> |
|                          |                                        | 24 h        | <b>0.000</b> |
| <i>Y. enterocolitica</i> | Aime-DEFB139                           | 8 h         | <b>0.000</b> |
|                          |                                        | 18 h        | <b>0.000</b> |
|                          |                                        | 24 h        | <b>0.000</b> |
|                          | Arg-to-Pro-substituted<br>Aime-DEFB139 | 8 h         | <b>0.000</b> |
|                          |                                        | 18 h        | <b>0.000</b> |
|                          |                                        | 24 h        | <b>0.000</b> |

117  
 118  
 119  
 120  
 121  
 122  
 123  
 124  
 125  
 126  
 127  
 128  
 129

130 **Supplementary Table S6** Student's t-test analyses of differences in antimicrobial activities  
 131 between the AcM-protected Aime-DEFB139 mature peptide and the Arg-to-Pro-substituted  
 132 Aime-DEFB139 peptide against *S. aureus*.  
 133 P < 0.05 indicates that Aime-DEFB139 had a statistically significantly higher antimicrobial  
 134 activity than the Arg-to-Pro-substituted Aime-DEFB139.

| Time points | Concentrations (mg/L) | P values     |
|-------------|-----------------------|--------------|
| 18 h        | 128                   | <b>0.000</b> |
|             | 64                    | <b>0.001</b> |
|             | 32                    | <b>0.001</b> |
| 24 h        | 128                   | <b>0.000</b> |
|             | 64                    | <b>0.000</b> |
|             | 32                    | <b>0.000</b> |
|             | 16                    | <b>0.000</b> |
|             | 8                     | <b>0.000</b> |
|             | 4                     | <b>0.002</b> |
|             | 2                     | <b>0.003</b> |
|             | 1                     | <b>0.006</b> |

135  
 136  
 137  
 138  
 139  
 140  
 141  
 142  
 143  
 144  
 145  
 146  
 147  
 148  
 149  
 150  
 151  
 152  
 153  
 154  
 155  
 156  
 157  
 158  
 159  
 160  
 161

162 **Supplementary Table S7** Branch model comparisons of cetacean *DEFB103* and *DEFB140* mature  
163 peptide regions.

164 Model A is a one-ratio model constraining a single  $\omega$  value to all branches. Model B is a  
165 two-ratio model that assigns a dN/dS ( $\omega$ ) to foreground cetacean lineages ( $\omega_1$ ), whereas all  
166 remaining lineages share another  $\omega$  ( $\omega_2$ ). The log likelihood ratio (LR) represents twice the log  
167 likelihood difference between the null one-ratio model and alternative two-ratio model.  
168 Degrees of freedom (df) indicate the difference between the number of parameters used in  
169 the two models.  $P < 0.05$  indicates that the alternative model is significantly more fit than the  
170 null model. Model B is more fit than model A, suggesting that both cetacean *DEFB103* and  
171 *DEFB140* have experienced a significantly increased positive selection compared with the  
172 selective pressure on other mammals.

| Model comparisons | LR    | df | $\omega_2/\omega_1$ | p           |
|-------------------|-------|----|---------------------|-------------|
| 103A vs. 103B     | 22.48 | 1  | 0.27/1.41           | <b>0.00</b> |
| 140A vs. 140B     | 7.83  | 1  | 0.16/0.75           | <b>0.01</b> |

173  
174  
175  
176  
177  
178  
179  
180  
181  
182  
183  
184  
185  
186  
187  
188  
189  
190  
191  
192  
193  
194  
195  
196  
197  
198  
199  
200



201 **Supplementary Table S8** Primers used to fill the gaps smaller than 5000 bp in the giant panda  
 202 defensin cluster.

203 To enhance amplification and ensure primer specificity, nested PCR was used and BLAST  
 204 alignment was used to assess the primers against the giant panda genome using  
 205 Primer-BLAST during their design. The corresponding PCR conditions are detailed in the  
 206 Supplementary Note.

| Primer name         | Primer sequence (5' to 3')   | Size (bp) | Ta (°C) |
|---------------------|------------------------------|-----------|---------|
| 103-SPAG11 gap_N1F  | ATGAACGGTAACAGTGTTGGTGG      | 1465      | 59      |
| 103-SPAG11 gap_N1R  | CAGCTCAGTTGTGAGGCAGAATAA     |           |         |
| 103-SPAG11 gap_N2F  | TGTGGACGTGATGAGGCTATG        | 507       | 59      |
| 103-SPAG11 gap_N2F  | ACTTGAGAACGGTCCCGATGC        |           |         |
| 109-130 gap_N1F     | AGTCTGTTGATAGGCTGAAAT        | 995       | 54      |
| 109-130 gap_N1R     | CATAAAAGGAAAGTAGTGTAGG       |           |         |
| 109-130 gap_N2F     | TTTTATAAGTGACACTGCATTC       | 472       | 53      |
| 109-130 gap_N2R     | ATAGAATAGTCTGGTGATGGGTA      |           |         |
| 116-117 gap1_N1F    | TCATCAGTTATCCCAAGCAAG        | 1425      | 55      |
| 116-117 gap1_N1R    | TGAGCAGTGTCATAGGAGGTT        |           |         |
| 116-117 gap1_N2F    | TGGGAAATAAAAACACACTCACGAT    | 1197      | 57      |
| 116-117 gap1_N2R    | ACTAAGAAACCAAGAACCCTC        |           |         |
| 116-117 gap2_N1F    | CTGAGGATGCAGGCTATT           | 2268      | 54      |
| 116-117 gap2_N1R    | CTGGAGTCTTGCGAACC            |           |         |
| 116-117 gap2_N2F    | TGATCTGAGGGATCTGGGACTG       | 780       | 56      |
| 116-117 gap2_N2R    | TCATGGATGAGGGCAAGAAAAT       |           |         |
| 116like-116gap1_N1F | GCAATGAGTACAGGCTAACG         | 1854      | 54      |
| 116like-116gap1_N1R | TACAGGCAAAGAAAGCAAGG         |           |         |
| 116like-116gap1_N2F | TTTTACTATGCTTTTAGGTTTC       | 639       | 49      |
| 116like-116gap1_N2R | AATATCTTCTAGCCTTGTT          |           |         |
| 116like-116gap2_N1F | GATGGCATTCAAAGGTGAC          | 4937      | 57      |
| 116like-116gap2_N1R | ACTGACTGAGCGAAAGGAG          |           |         |
| 116like-116gap2_N2F | CTCCCCAGGTTATTGAGATATGAC     | 559       | 60      |
| 116like-116gap2_N2R | ACTGAACTCAAAGAAACAGAGTGGTAG  |           |         |
| 116like-116gap2_N1F | GATGGCATTCAAAGGTGAC          | 4937      | 57      |
| 116like-116gap2_N1R | ACTGACTGAGCGAAAGGAG          |           |         |
| 116like-116gap3_N2F | ATAACCATTTTTCTGTCATGAAGTG    | 470       | 56      |
| 116like-116gap3_N2R | TGATCAACAGGTGCATGAATAGATG    |           |         |
| 116like-116gap2_N1F | GATGGCATTCAAAGGTGAC          | 4937      | 57      |
| 116like-116gap2_N1R | ACTGACTGAGCGAAAGGAG          |           |         |
| 116like-116gap4_N2F | ATTCATGCACCTGTTGATCATTGTATG  | 768       | 60      |
| 116like-116gap4_N2R | TAGCACCAGAAACCATAAGACATCTCTG |           |         |
| 126like-126gap1_N1F | TGTTACCTGTTTCTGGTTCAT        | 2986      | 55      |
| 126like-126gap1_N1R | ATTGGCTAATATCTTCTTGTCTC      |           |         |
| 126like-126gap1_N2F | GGCTTAGTTTCTATGCAAGGAT       | 1046      | 54      |
| 126like-126gap1_N2R | AAATAATGGCTCTGATATGACC       |           |         |

|                     |                           |      |    |
|---------------------|---------------------------|------|----|
| 126like-126gap1_N1F | TGTTACCTGTTTCCTGGTTCAT    | 2986 | 55 |
| 126like-126gap1_N1R | ATTGGCTAATATCTTCCTTGTTC   |      |    |
| 126like-126gap2_N2F | AAGTCAATAAATGGCGACAAAT    | 1055 | 53 |
| 126like-126gap2_N2R | CTAACCAGGCACCTAACTAATC    |      |    |
| 126like-126gap3_N1F | TTACTTCCTTTCCAGCCACTCC    | 2446 | 60 |
| 126like-126gap3_N1R | CTTTGCTTCGTACAGCACCAACCT  |      |    |
| 126like-126gap3_N2F | GAATGAAAGCACATATCAATAAAGG | 1178 | 54 |
| 126like-126gap3_N2R | AAGGAGAATAATGAGAAGCCAAA   |      |    |
| 129-128gap_N1F      | CAGGGCTTGATCTTACCACC      | 1306 | 58 |
| 129-128gap_N1R      | AACCATTACAGTCATGCTTCC     |      |    |
| 129-128gap_N2F      | GATGTGGGTATGCTAGTGATG     | 868  | 53 |
| 129-128gap_N2R      | ATTTGGTGGCTTGGATT         |      |    |

207  
208  
209  
210  
211  
212  
213  
214  
215  
216  
217  
218  
219  
220  
221  
222  
223  
224  
225  
226  
227  
228  
229  
230  
231  
232  
233  
234  
235  
236  
237  
238

239 **Supplementary Table S9** Primers used to amplify large gaps or pick BAC clones covering large  
 240 gaps, and the universal primers used to amplify big gaps or BAC clone templates.  
 241 BLAST was used to align all primers against the giant panda genome with Primer-BLAST to  
 242 ensure primer specificity. For detailed PCR conditions, please refer to the Supplementary  
 243 Note.

| Primer name           | Primer sequence (5' to 3') | Size (bp) | Ta (°C) |
|-----------------------|----------------------------|-----------|---------|
| 126like-126gap4_F     | CATCATCAACTCTAACACGA       | 7597      | 56      |
| 126like-126gap4_R     | GACCTTAATAATAGCCCATC       |           |         |
| 126universal_F        | GRARGAGTYCYAACATCTCTTCA    | 1240      | 58      |
| 126 universal_R       | GCCTCAYTTGTGYCTGGCMTCT     |           |         |
| 126like-116like BAC_F | CCACGGTCAACATTCATA         | 304       | 52      |
| 126like-116like BAC_R | AGAGGTTCTTGAGGATA          |           |         |
| 126like universal_F   | YCCASKTGGTYTCAGGTAAA       | 158       | 57      |
| 126like universal_R   | TRTTCTGAAGAARTARRGCAAA     |           |         |
| 116like universal_F   | GTCAGTYATGAAGCCCTRTTTAAT   | 101       | 57      |
| 116like universal_R   | CARRACCCAGAAYYTTTGA        |           |         |
| 129-128gap2_F         | TCCTTCTGGAATACAACCT        | 5958      | 63      |
| 129-128gap2_R         | TACCAGCACATCCTGAACAC       |           |         |
| 128 universal_F       | CTGCCTYRGGAACTAATCT        | 320       | 50      |
| 128 universal_R       | TTTARGARGAGTGGASACC        |           |         |
| 130BAC_F              | CAACGAGATACCACCTCATACCAGA  | 867       | 60      |
| 130BAC_R              | AAACATTCTAAACGTGGCACCTATT  |           |         |
| 130 universal_F       | TYCCNGGRCARAARCAGT         | 150       | 53      |
| 130 universal_R       | TGGGARCNGGHGTTGSRTA        |           |         |

244  
 245  
 246  
 247  
 248  
 249  
 250  
 251  
 252  
 253  
 254  
 255  
 256  
 257  
 258  
 259  
 260  
 261  
 262  
 263

264 **Supplementary Table S10** Primers used to examine the expression pattern of different  
 265  $\beta$ -defensins.  
 266 Thirty-six primer pairs were designed, but only those that detected expression are listed. The  
 267 host *GAPDH* gene (glyceraldehyde-3-phosphate dehydrogenase) was used as an internal  
 268 reference. For detailed PCR conditions, please refer to the Supplementary Note.

| Primer name | Primer sequence (5' to 3') | Size (bp) | T <sub>a</sub> (°C) |
|-------------|----------------------------|-----------|---------------------|
| Aime1_F     | TGCCTACACCGGGCATCC         | 120       | 60                  |
| Aime1_R     | TGACCTCTGGCCGAAACCTG       |           |                     |
| Aime103_F   | GAGGATCTATTACCTTCTCCTCCTG  | 198       | 61                  |
| Aime103_R   | TTCTTTCTTCGGCAGCACTT       |           |                     |
| Aime139_F   | GTCCTCTTCATCTCTCACACAAT    | 110       | 60                  |
| Aime139_R   | TGCGAACCAGACAGTTTCTC       |           |                     |
| Aime140_F   | ATGGTCCTGCAGGTACTGC        | 111       | 57                  |
| Aime140_R   | GGAAGGGCTCACAGTTTGGT       |           |                     |
| GAPDH_F     | GGGGTGATGCTGGTGTGAGTATGT   | 264       | 62                  |
| GAPDH_R     | TGAGTCCCTCCACGATGCCGAAGT   |           |                     |

269

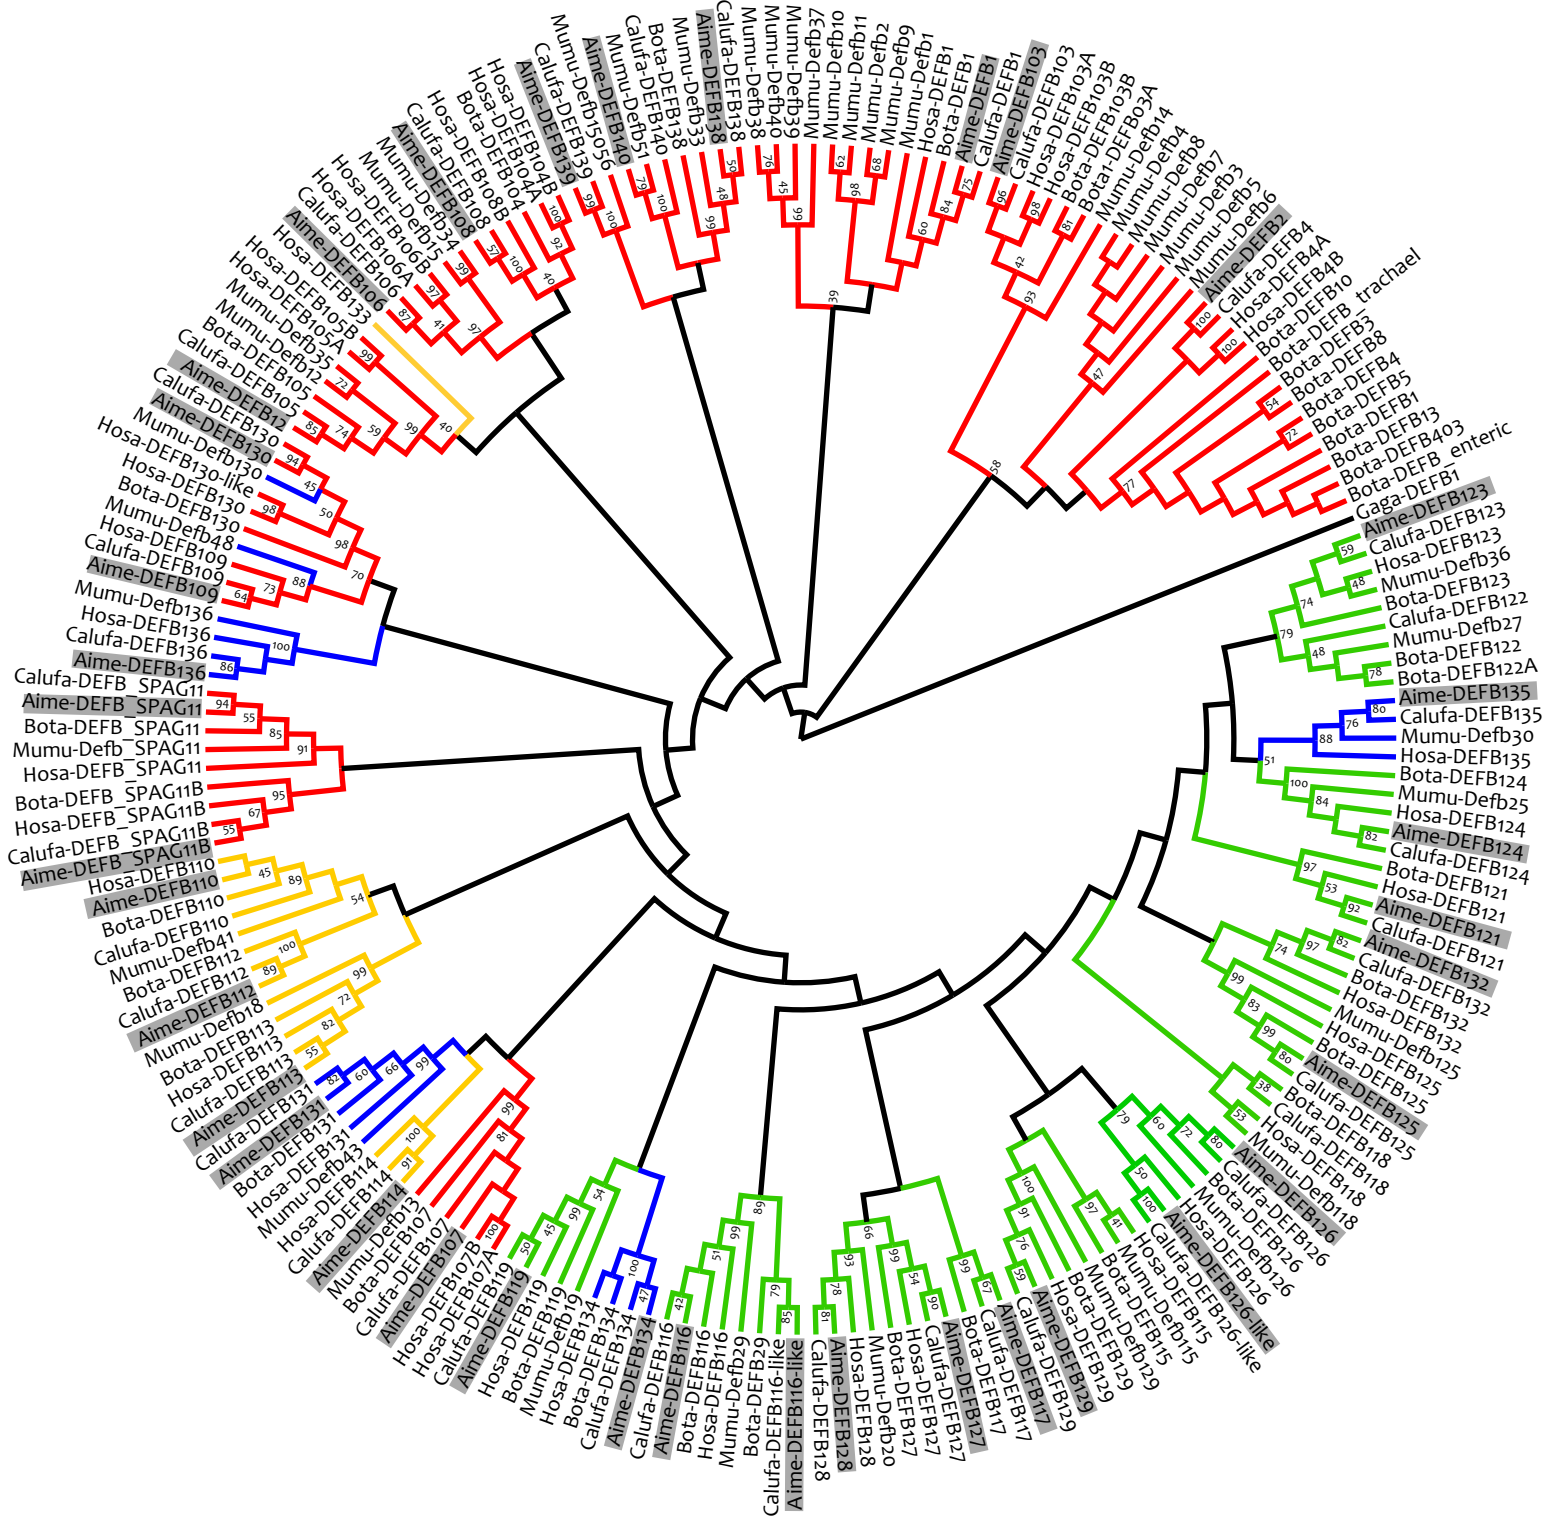

270 **Supplementary Figure S1** Detailed neighbour-joining tree of  $\beta$ -defensins expressed in the  
 271 giant panda, dog, cattle, mouse, and humans. The names of the genes start with the  
 272 abbreviation of the Latin species name followed by the name of the  $\beta$ -defensins. The chicken  
 273  $\beta$ -defensin 1 (Gaga-DEFB1) was used as an outgroup, and bootstrap values under 40 are not  
 274 shown. Lineages from the same chromosome are depicted in the same colour, and orthologs  
 275 in the giant panda are shaded in grey.  
 276

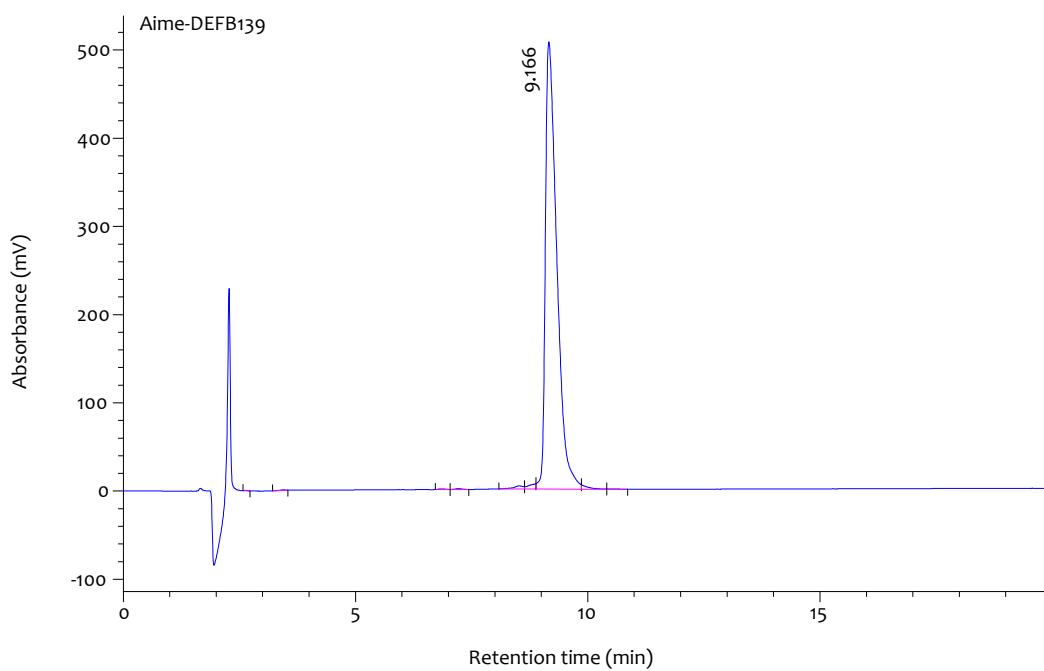

a

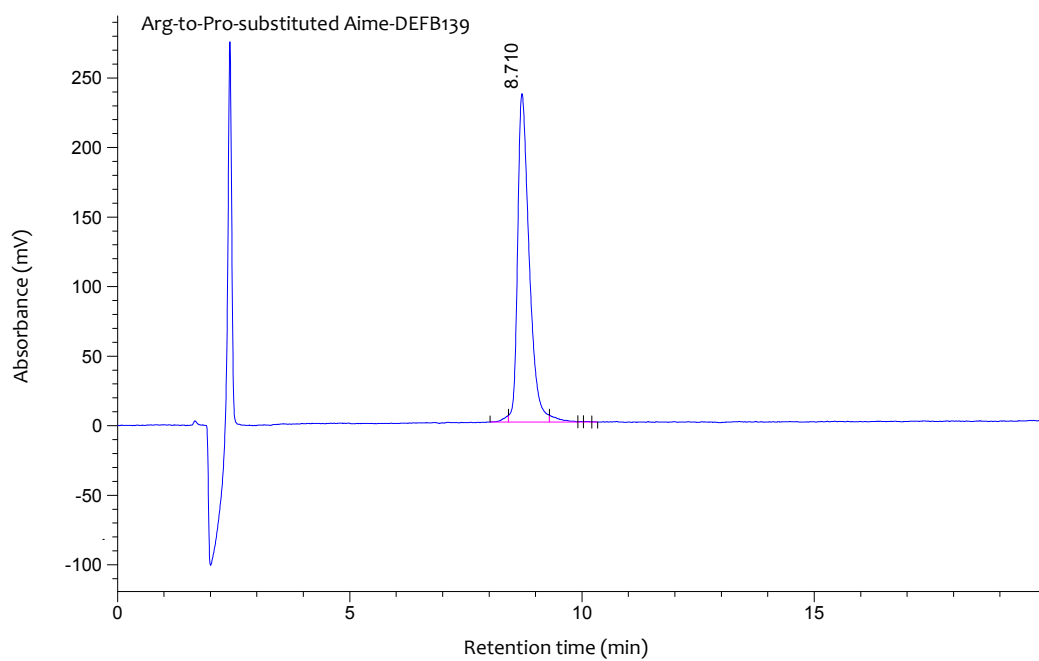

b

277

278 **Supplementary Figure S2** HPLC chromatograms of the synthesized Aime-DEFB139 and  
279 Arg-to-Pro-substituted Aime-DEFB139 with their Cys residues protected by Acm. **a)**  
280 Acm-protected Aime-DEFB139. **b)** Acm-protected Arg-to-Pro-substituted Aime-DEFB139.

281

282

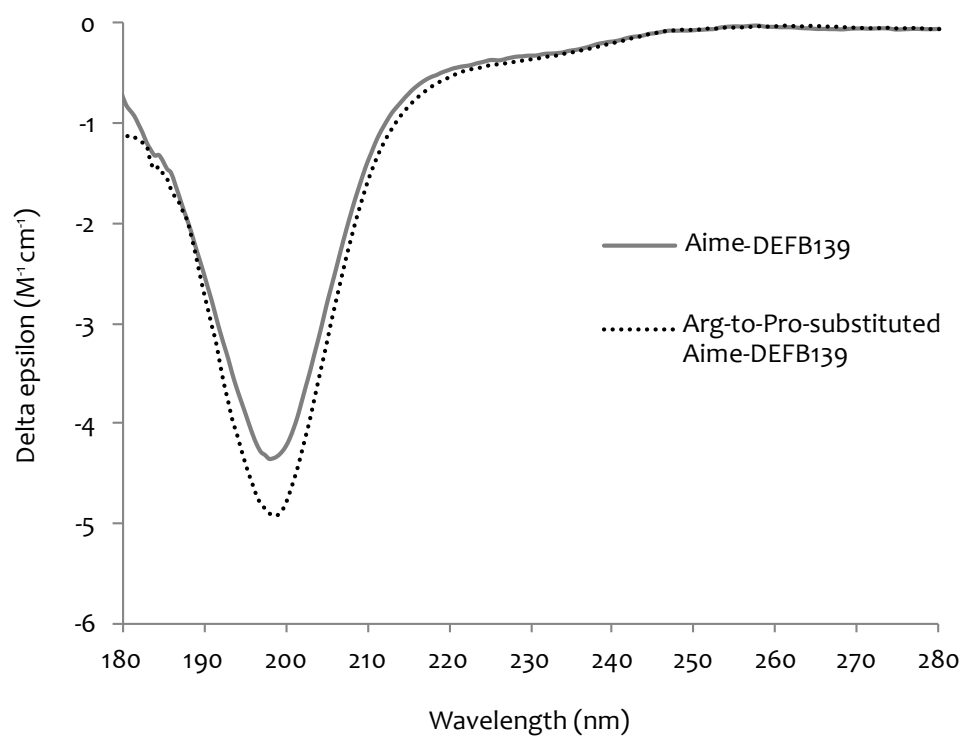

283

284 **Supplementary Figure S3** CD spectra of Acm-protected Aime-DEFB139 and  
285 Arg-to-Pro-substituted Aime-DEFB139.

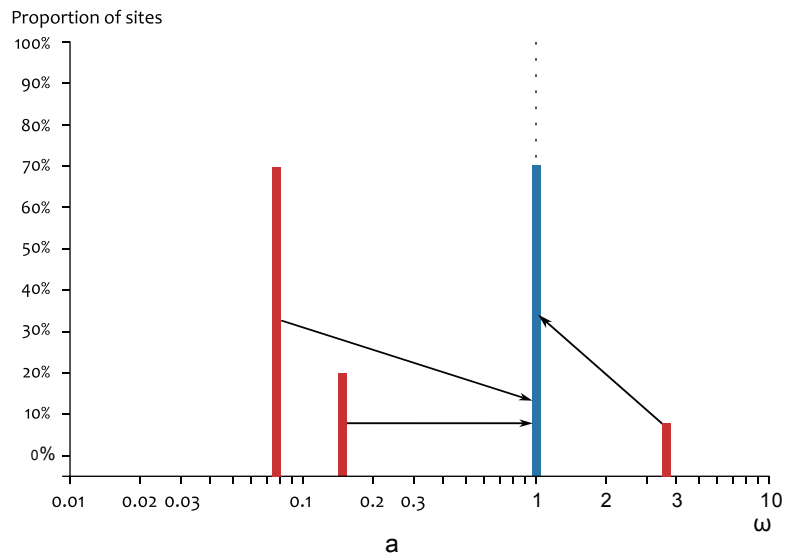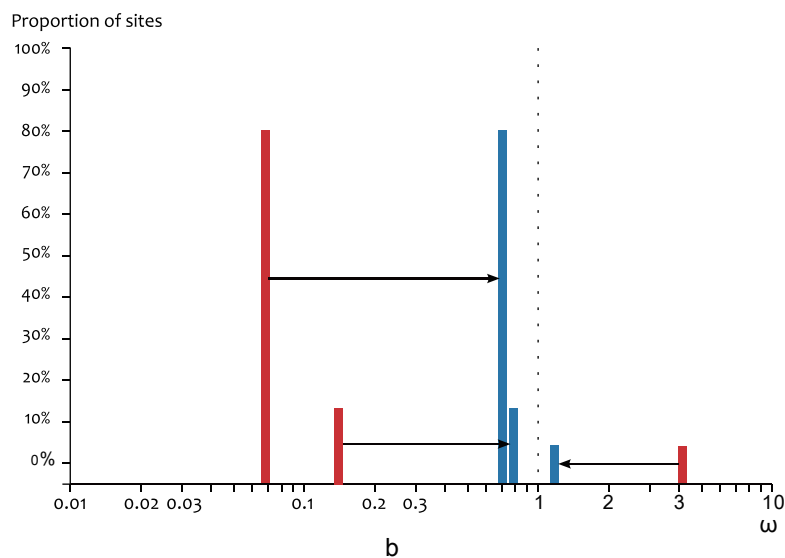

286

287 **Supplementary Figure S4** The relaxed selective pressures on the mature peptide region of  
 288 cetacean *DEFB103* (a) and *DEFB140* (b). Blue bars represent cetacean lineages, red bars  
 289 represent all remaining mammals, and lines with arrows indicate the direction of the changes  
 290 in  $\omega$ . **a)** In other mammals, approximately 90% of the sites are under negative selection and  
 291 10% of sites have  $\omega > 1$ . However, in cetaceans the proportion of sites under negative selection  
 292 has decreased, whereas additional sites, such as those that experienced positive selection in  
 293 other mammals, have become selectively neutral. **b)** Compared with the selective pressures  
 294 on other mammals, those on sites in cetaceans have changed towards neutral selection. The  
 295 results suggest that the increased selective pressure revealed by branch model comparisons  
 296 (Supplementary Table S6) is actually a relaxation of both purifying and positive selection.

297

298

299

300

301

302

303

304



## 305 **Supplementary Methods**

### 306 **Detecting selective pressure on the carnivore DEFB139 signal peptide**

307 The best nucleotide substitution model for signal peptide regions was estimated using MEGA  
308 6.0 to acquire the transition/transversion bias (R). After defining the “Carnivora” and  
309 “non-Carnivora” groups, the average rates of synonymous (dS) and nonsynonymous (dN)  
310 substitutions in the signal peptide region of *DEFB139* genes and the significance of the  
311 selection was evaluated by a Z-test of selection in MEGA 6.0 using a modified Nei and  
312 Gojobori method with the Jukes-Cantor correction, the estimated R, 1,000 bootstrap  
313 replications, and a 90% site coverage cut-off. The evolutionary distance (represented by dN/dS)  
314 between the signal peptide of each carnivore *DEFB139* gene and non-carnivore *DEFB139* gene  
315 was calculated using the “between group mean distance” analysis in MEGA 6.0 with the  
316 settings listed above.

317

### 318 **RELAX analysis of changes in the selective pressure on carnivore $\beta$ -defensin genes**

319 The RELAX program calculates changes of the foreground branch relative to the background  
320 branch in proportion of sites with different  $\omega$  categories to test the significance of alterations  
321 in selective pressure. Each time a different carnivore lineage was set as the foreground  
322 branch to test it against all non-carnivores to determine whether the intensification of  
323 selective pressure on the panda defensins was more significant. To determine the influence of  
324 transformation of lifestyle and living environment on the evolutionary scheme of  $\beta$ -defensins,  
325 we also conducted branch modelling and RELAX analyses on the cetacean *DEFB1*, *DEFB103*,  
326 *DEFB139*, and *DEFB140* using the entire coding sequence and mature peptide region. The  
327 procedure was the same as in the analysis of panda defensins, except that the entire cetacean  
328 lineage was used as the foreground branch. The analysis revealed that the cetacean *DEFB103*  
329 and *DEFB140* genes were under a relaxed selective pressure regardless of whether the entire  
330 sequence or mature peptide region was evaluated. Only the results derived from the mature  
331 peptide region are presented.

332

## 333 **Supplementary Note**

### 334 **Confirmation of Aime-*DEFB139* as a unique gene in the giant panda**

335 To confirm that the Pro-to-Arg mutation is a unique substitution rather than a polymorphism  
336 in the giant panda, we amplified the mature peptide region containing the mutation site in 49  
337 individuals from different populations, including 28 individuals from a Sichuan nominal  
338 subspecies (*A. m. melanoleuca*) and 21 individuals from the Qingling subspecies (*A. m.*  
339 *qinlingensis*)<sup>1</sup>. All individuals presented monomorphisms at the amplified region; thus, it is  
340 likely that the mutation is unique.

341

342 The amplification was performed using preserved DNA from a previous study with the  
343 following primers: 139mature\_1 forward (5'-GCCTCCACATAACACCATAA-3') and 139mature\_2  
344 reverse (5'-ATTGAGCGTGACTTCTTCG-3'). The amplified product had a size of 430 bp, and the  
345 annealing temperature used in the PCR method was 55 °C. The DNA from some skin samples  
346 had degraded; therefore, a second round of amplification was performed using the following  
347 primers: 139mature\_2 forward (5'-GTGAAGTGACCATTCTGTGACTC-3') and 139mature\_2  
348 reverse (5'-AAGCTCCTCCAGGGCAT-3'). The product size was 100 bp, and the annealing

349 temperature used was 53 °C. The PCR conditions are listed below.

350

351 **PCR conditions used in the experiment**

352 Conditions for nested PCR:

353 The first round:

|     |                      |       |         |             |
|-----|----------------------|-------|---------|-------------|
| 354 | Initial denaturation | 94 °C | 5 min   |             |
| 355 | Denaturation         | 94 °C | 30 s    | } 22 cycles |
| 356 | Annealing            | Ta °C | 30 s    |             |
| 357 | Extension            | 72 °C | 30 s/kb |             |
| 358 | Final extension      | 72 °C | 7 min   |             |

359 The second round:

|     |                      |       |         |             |
|-----|----------------------|-------|---------|-------------|
| 360 | Initial denaturation | 94 °C | 5 min   |             |
| 361 | Denaturation         | 94 °C | 30 s    | } 31 cycles |
| 362 | Annealing            | Ta °C | 30 s    |             |
| 363 | Extension            | 72 °C | 30 s/kb |             |
| 364 | Final extension      | 72 °C | 5 min   |             |

365 The enzyme used for filling big gaps (>5 kb) was the Q5 high-fidelity DNA polymerase. The  
366 PCR conditions were as follows:

|     |                      |       |         |             |
|-----|----------------------|-------|---------|-------------|
| 367 | Preheat              | 98 °C |         |             |
| 368 | Initial denaturation | 98 °C | 3 min   |             |
| 369 | Denaturation         | 98 °C | 10 s    | } 33 cycles |
| 370 | Annealing            | Ta °C | 30 s    |             |
| 371 | Extension            | 72 °C | 45 s/kb |             |
| 372 | Final extension      | 72 °C | 2 min   |             |

373 The following conditions were used for all other PCR:

|     |                      |       |         |             |
|-----|----------------------|-------|---------|-------------|
| 374 | Initial denaturation | 94 °C | 5 min   |             |
| 375 | Denaturation         | 94 °C | 30 s    | } 32 cycles |
| 376 | Annealing            | Ta °C | 30 s    |             |
| 377 | Extension            | 72 °C | 30 s/kb |             |
| 378 | Final extension      | 72 °C | 5 min   |             |

379

380 **Supplementary Data S1 Sequence alignments for all  $\beta$ -defensins in humans, mice, cattle,**  
381 **dogs, and pandas.**

382 Exons were translated and then aligned separately. Dashes indicate the gaps, and three gaps  
383 were used to separate the signal sequences and mature sequences. Data are provided in fasta  
384 format.

385

386 **Supplementary Data S2 All  $\beta$ -defensin genes in humans, mice, cattle, dogs, and pandas.**

387 Scaffold and coordinate information are included. Data are provided in fasta format.

388

389 **Supplementary Data S3 Sequence alignments of DEFB1, DEFB103, DEFB139, and DEFB140 (in**  
390 **fasta format).**

391 Two exons were translated and then aligned separately. Dashes indicate gaps, and three gaps  
392 were used to separate the signal sequences and mature sequences. Data provided in fasta  
393 format.

394

395 **Supplementary Data S4 Orthologs of *DEFB1*, *DEFB103*, *DEFB139*, and *DEFB140* genes.**

396 Coordinate information are included. Data are provided in fasta format.

397

#### 398 **Reference**

- 399 1. Chen, Y.Y. *et al.* Natural selection coupled with intragenic recombination shapes diversity  
400 patterns in the major histocompatibility complex class II genes of the giant panda. *J. Exp. Zool.*  
401 (*Mol. Dev. Ecol.*) **314B**, 208–223 (2010).

402
